# Supplementary material
Source: Research Square preprint supplement (doi:10.21203/rs.3.rs-9632157/v1)
Supplement: Supplementary file 1 [file c8ce4e172f97bd0d2b2f8443.docx]

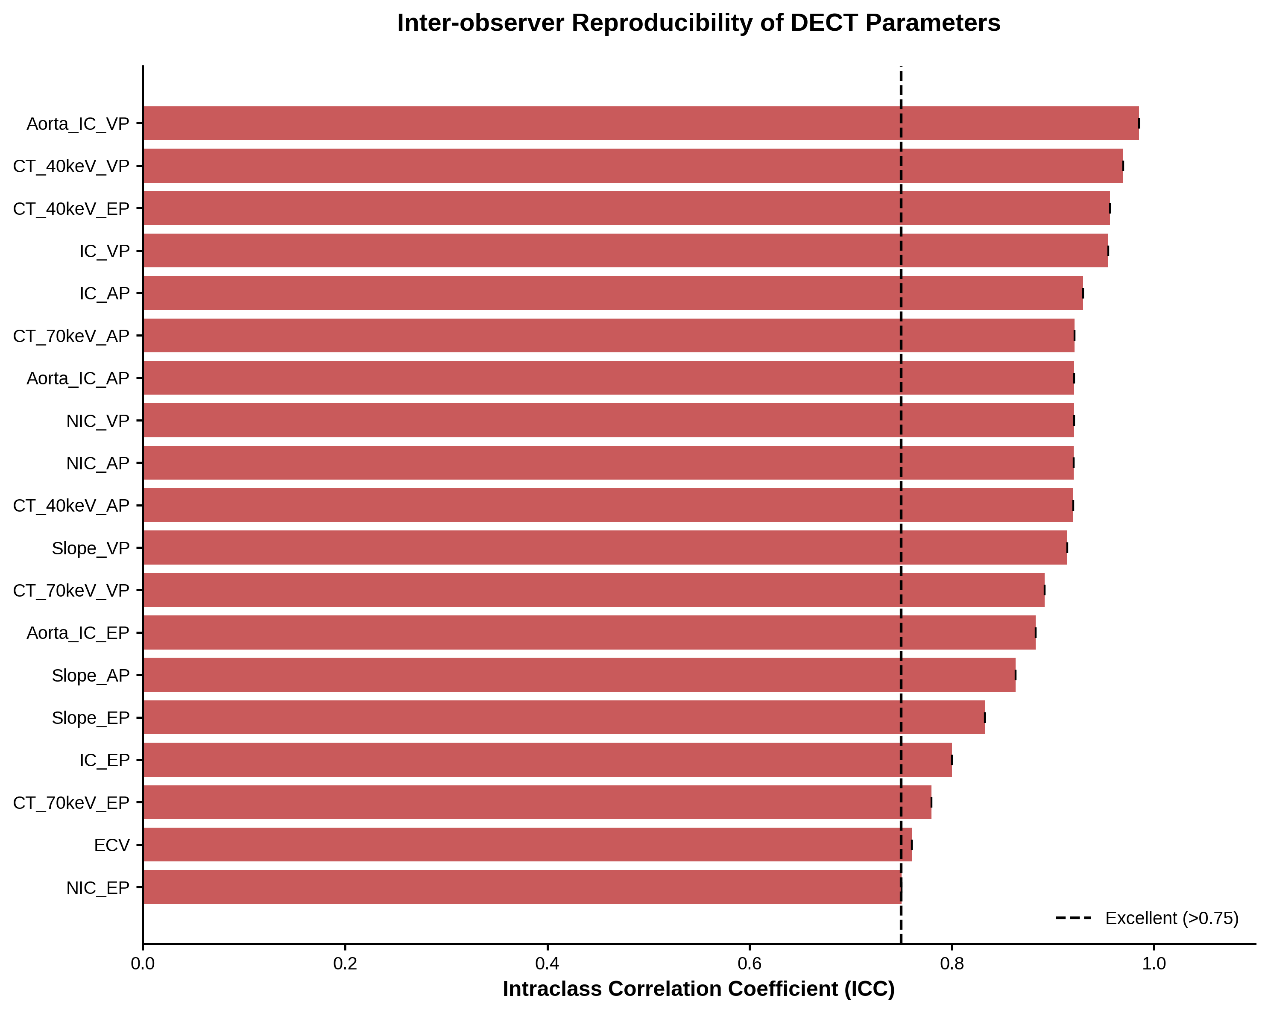


**Supplementary Figure E1: Interobserver reproducibility of quantitative dual-energy CT parameters.**

**Note.—** Horizontal bar chart illustrates the intraclass correlation coefficients (ICCs) for 19 quantitative parameters between two independent readers. The vertical dashed line indicates the threshold for excellent agreement (ICC = .75). Error bars represent 95% CIs. All functional spectral parameters (slopes) and iodine concentration metrics exceeded this threshold, confirming high measurement stability for model construction. AP = arterial phase, DECT = dual-energy CT, ECV = extracellular volume fraction, EP = equilibrium phase, IC = iodine concentration, NIC = normalized iodine concentration, VP = venous phase.


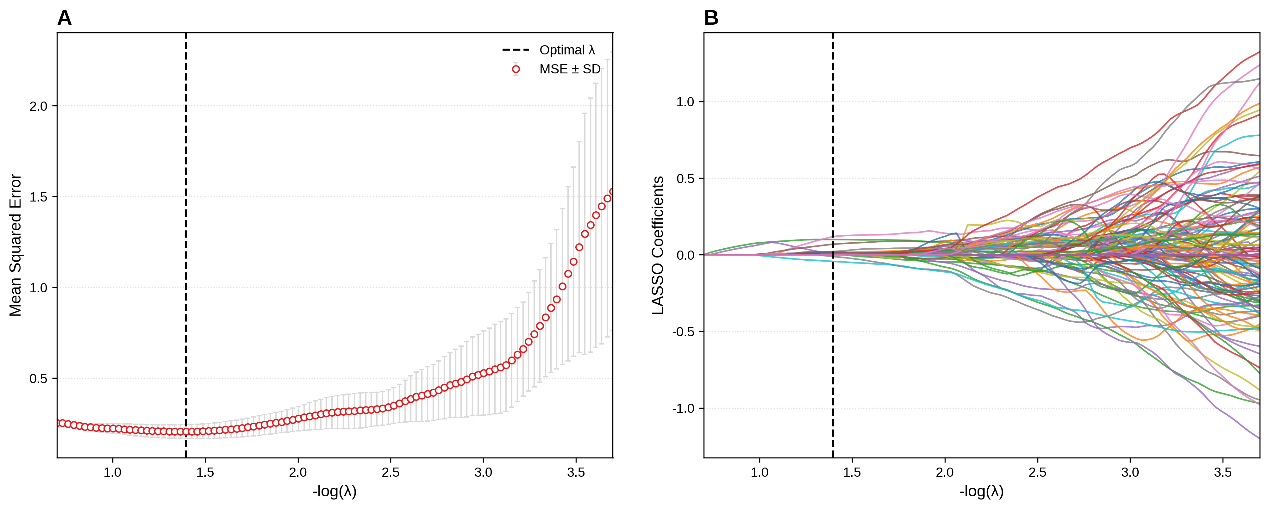


**Supplementary Figure E2: Radiomic and spectral feature selection using the least absolute shrinkage and selection operator (LASSO) method.**

**Note.—** **(A)** Selection of the optimal tuning parameter (*λ*) via 10-fold cross-validation. The mean squared error (MSE) is plotted against −*log*(*λ*). The vertical dashed line indicates the optimal *λ* value where the MSE is minimized, ensuring a balance between model complexity and predictive power. **(B)** LASSO coefficient profile plot against the −*log*(*λ*) sequence. Each colored line represents the coefficient of a candidate feature. At the optimal *λ* value, 12 features with non-zero coefficients were identified to construct the final signature.


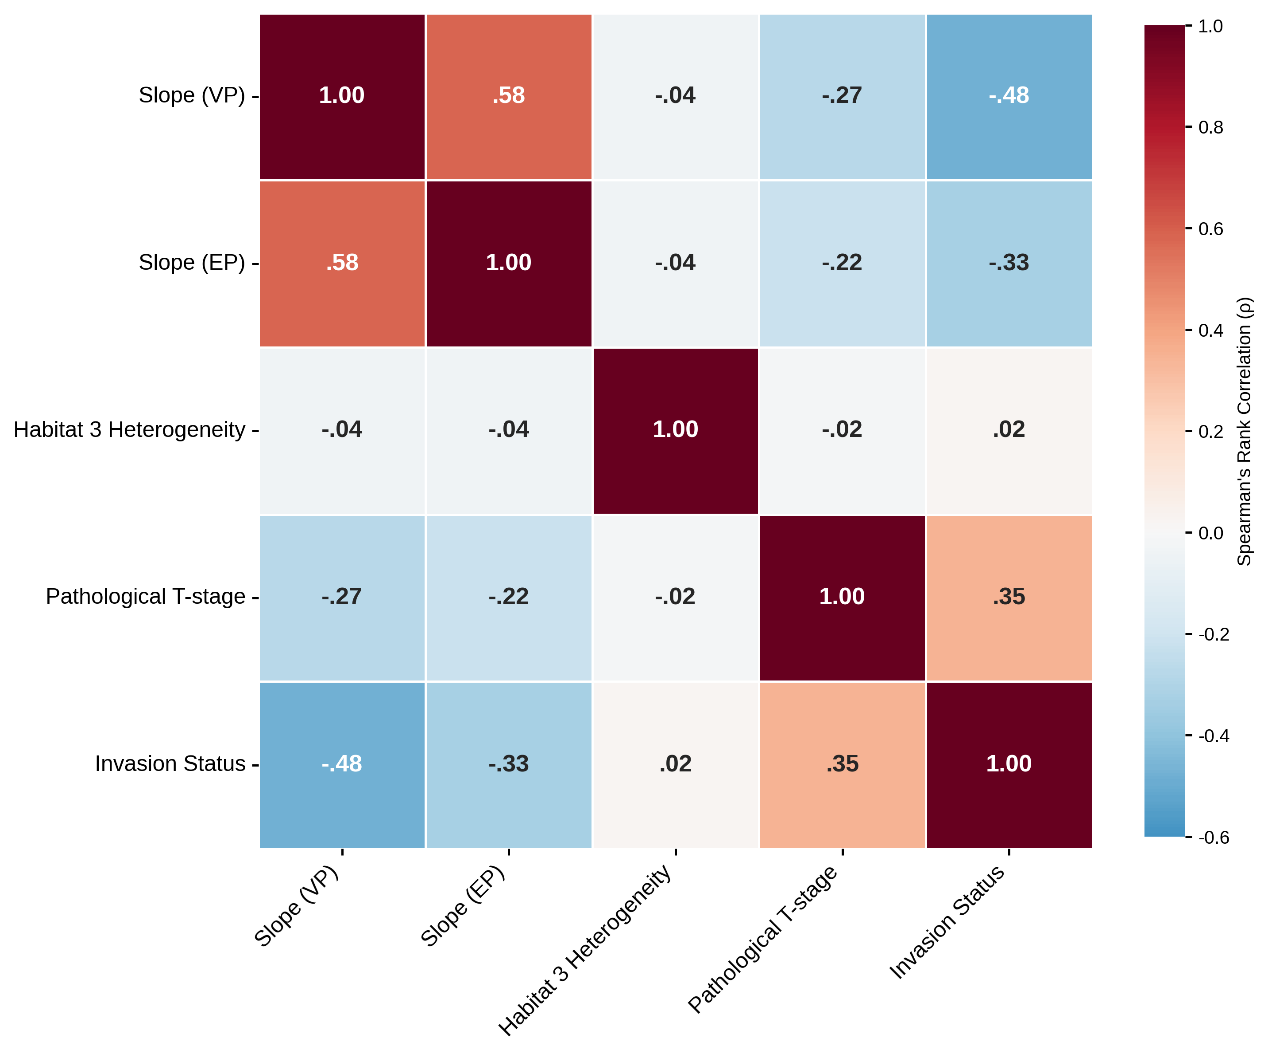


**Supplementary Figure E3: Biological correlation between the Habitat-Spectral signature and pathological markers.**

**Note.—** Heatmap illustrates Spearman correlation coefficients (*ρ*) between the three components of the integrated model and macroscopic pathological findings. Venous-phase spectral slope (Slope_VP) shows the strongest negative association with invasion status (*r* = –.48, *P* < .001), supporting its role as a functional surrogate for tissue microenvironment remodeling.
